# Supplementary figures and images for: Changes in type 2 diabetes incidence and mortality associated with introduction of HbA1c as diagnostic option: A Danish 24-year population-based study
Source: PubMed Central journal article supplement — Lancet Reg Health Eur. 2022 Jan 1;14:100291. doi: 10.1016/j.lanepe.2021.100291 (PMC8733171; doi:10.1016/j.lanepe.2021.100291), 2022-01-01

female

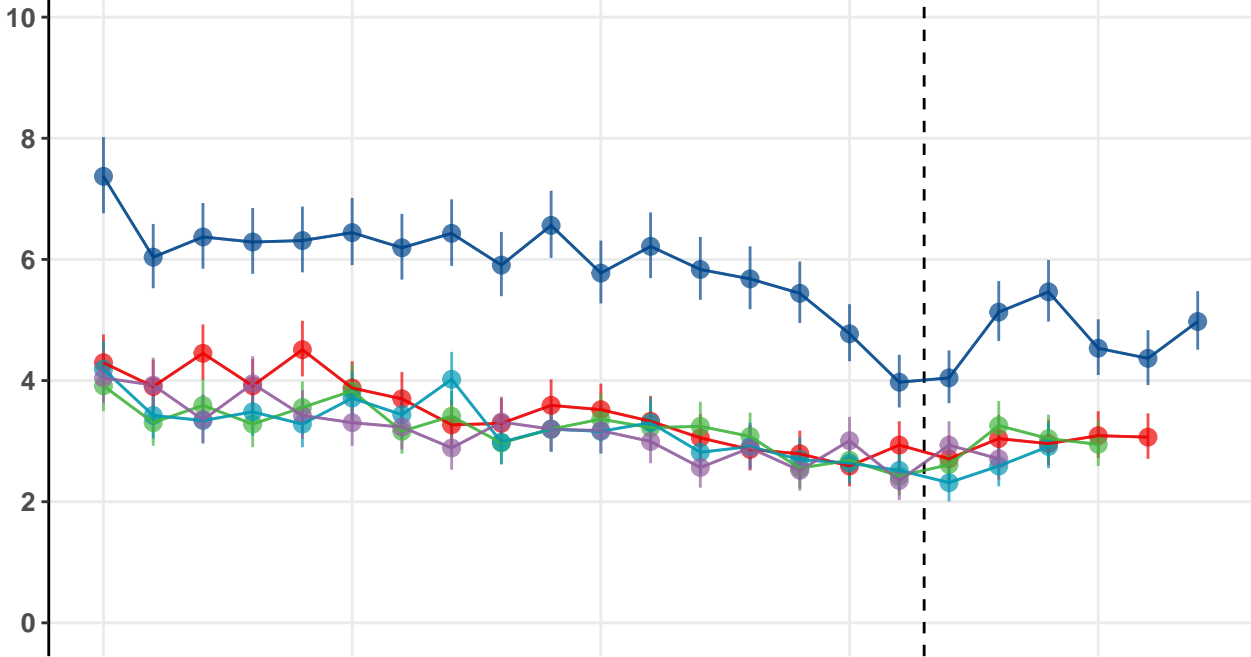

male

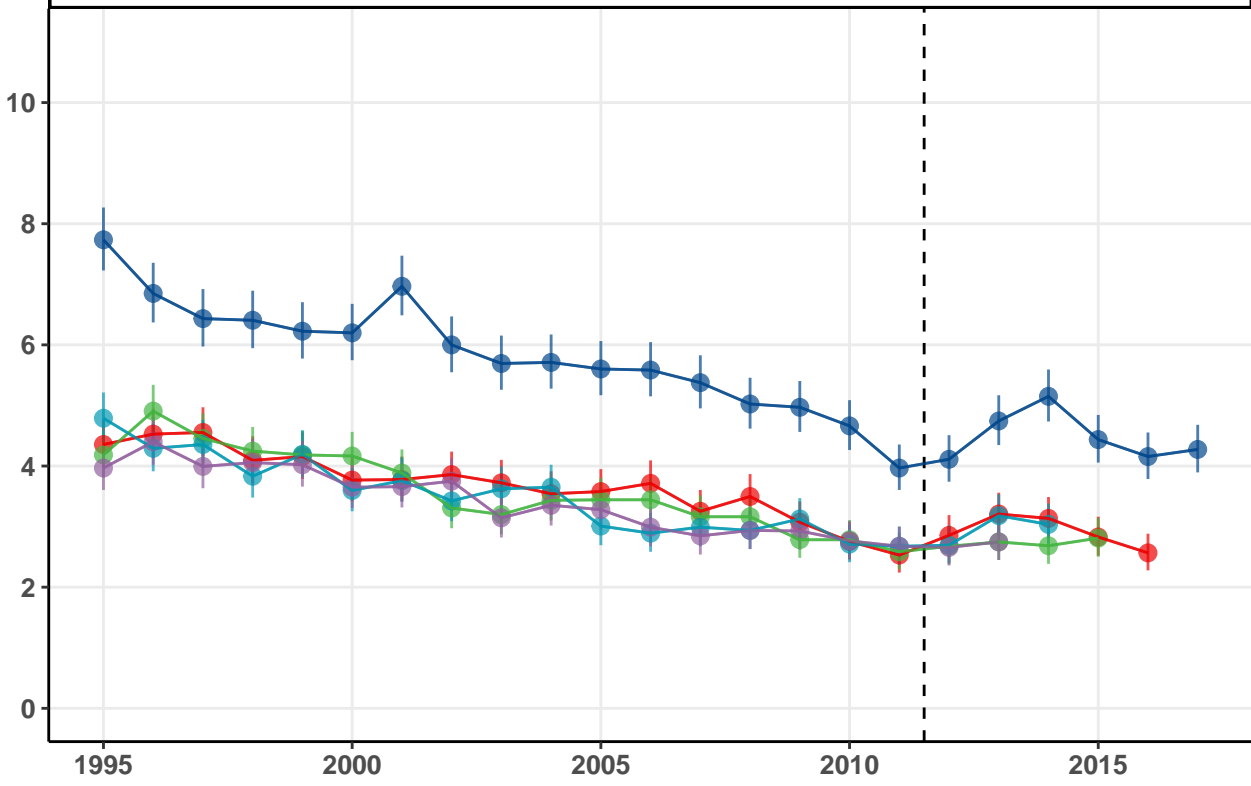

0-1 years 1-2 years 2-3 years 3-4 years 4-5 years

Supplement: mmc11.pdf [file mmc11.pdf]

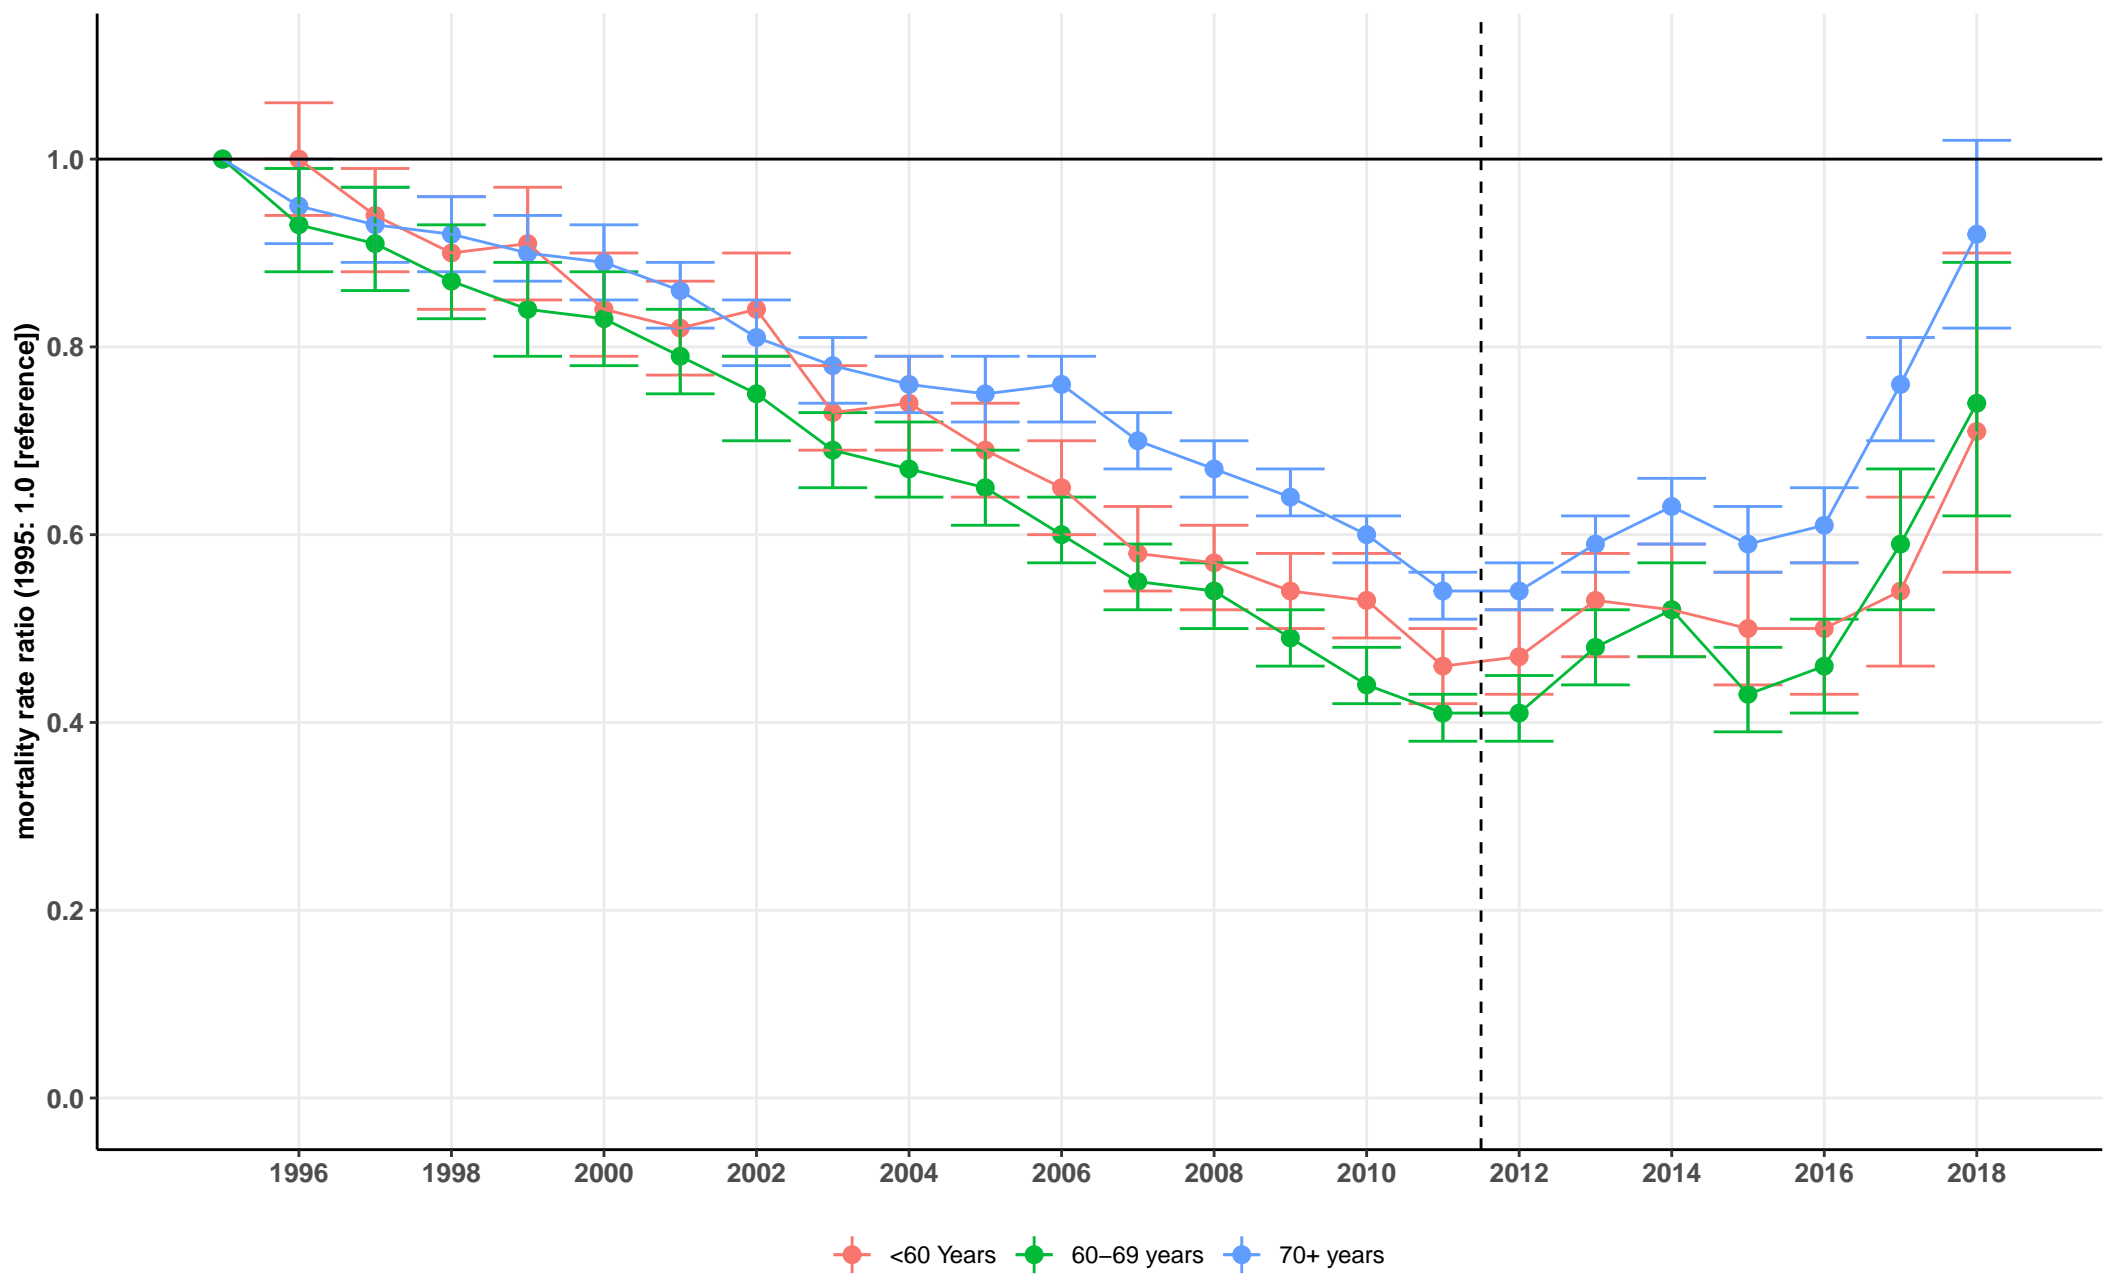

Supplement: mmc12.pdf [file mmc12.pdf]

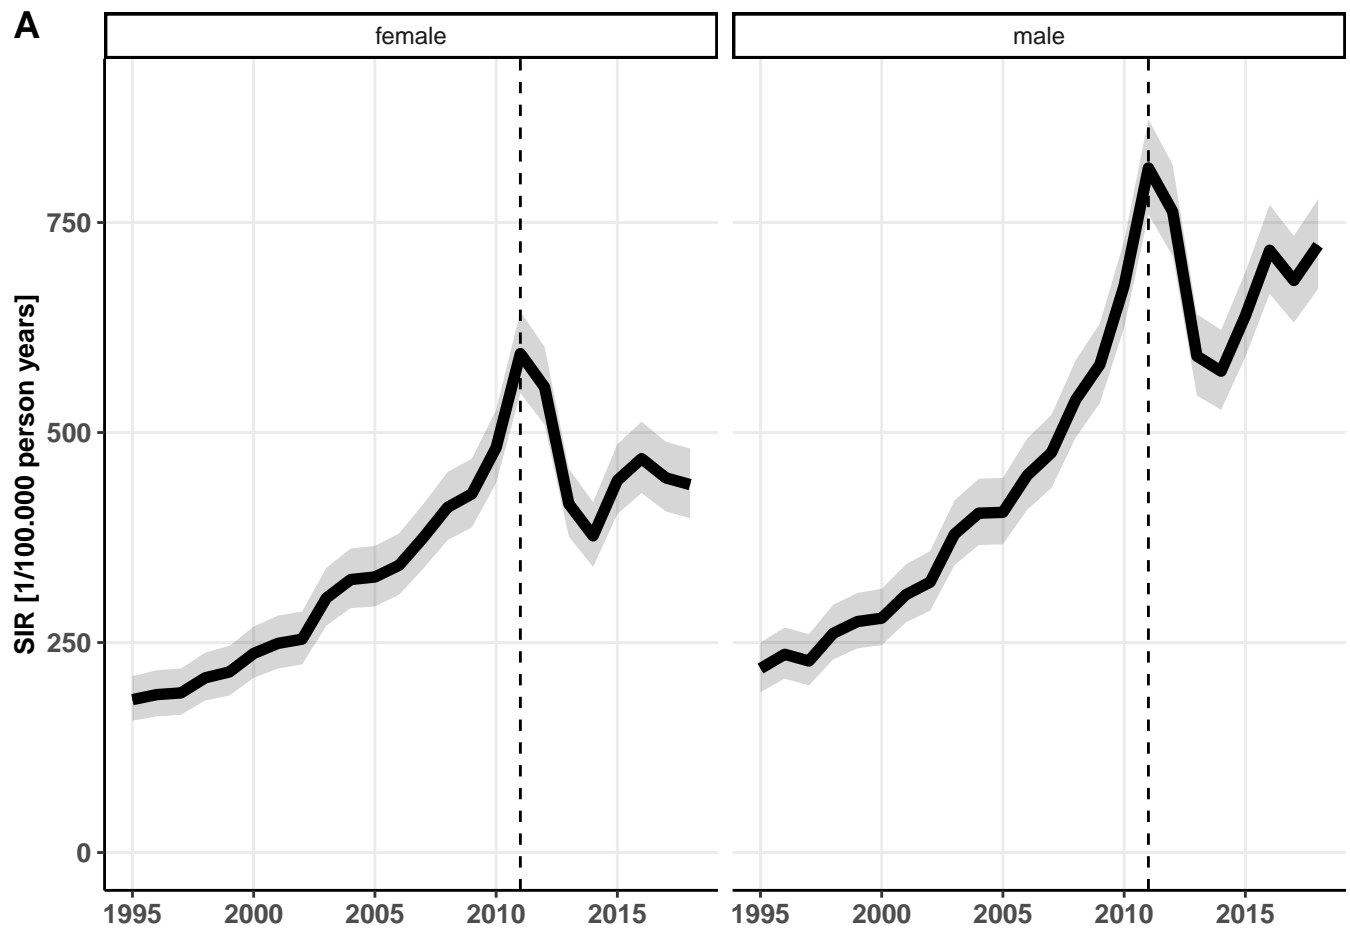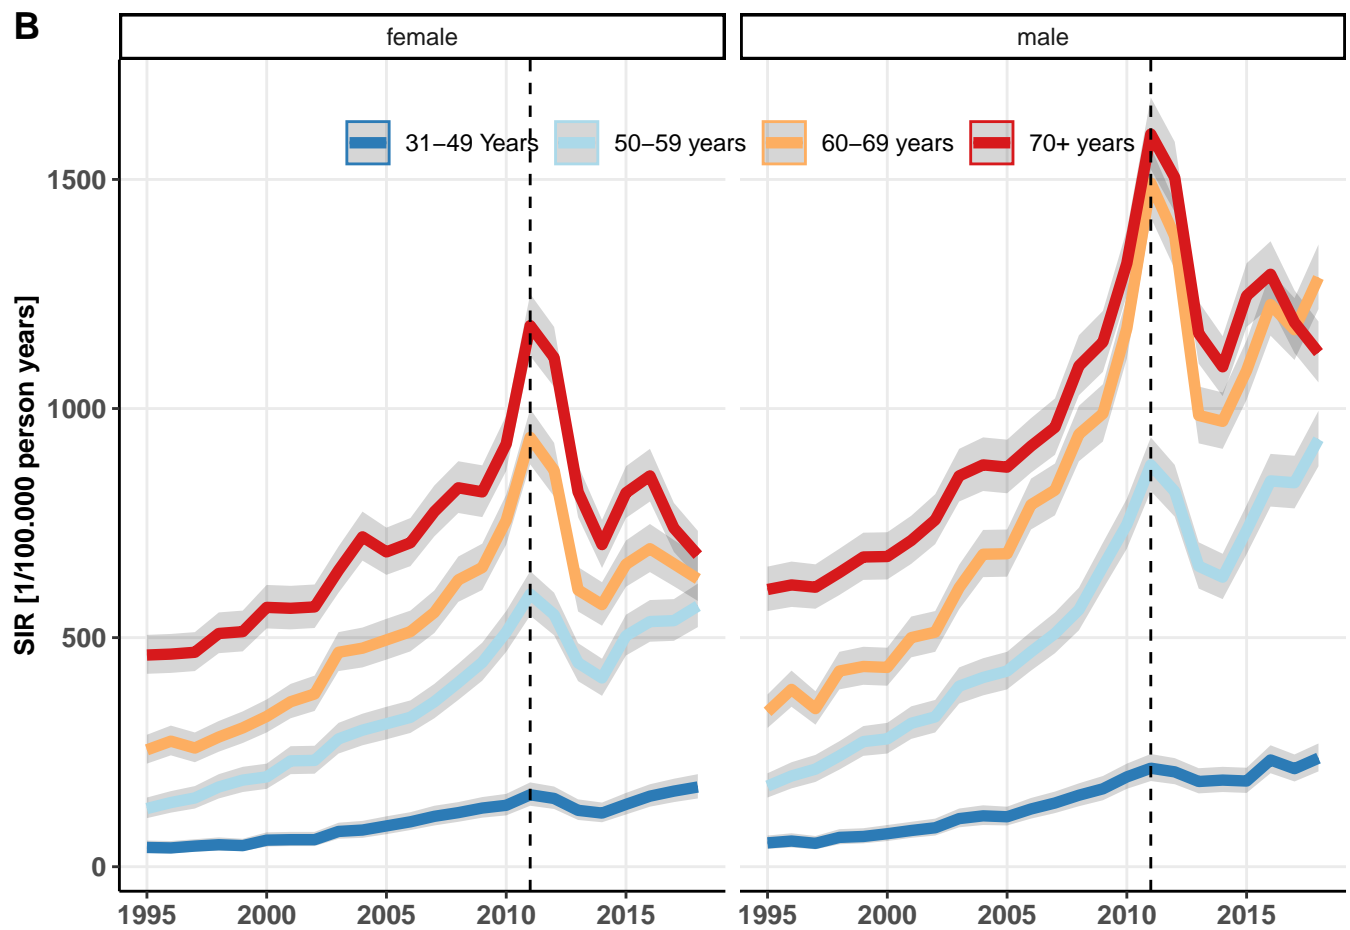

Supplement: mmc2.pdf [file mmc2.pdf]

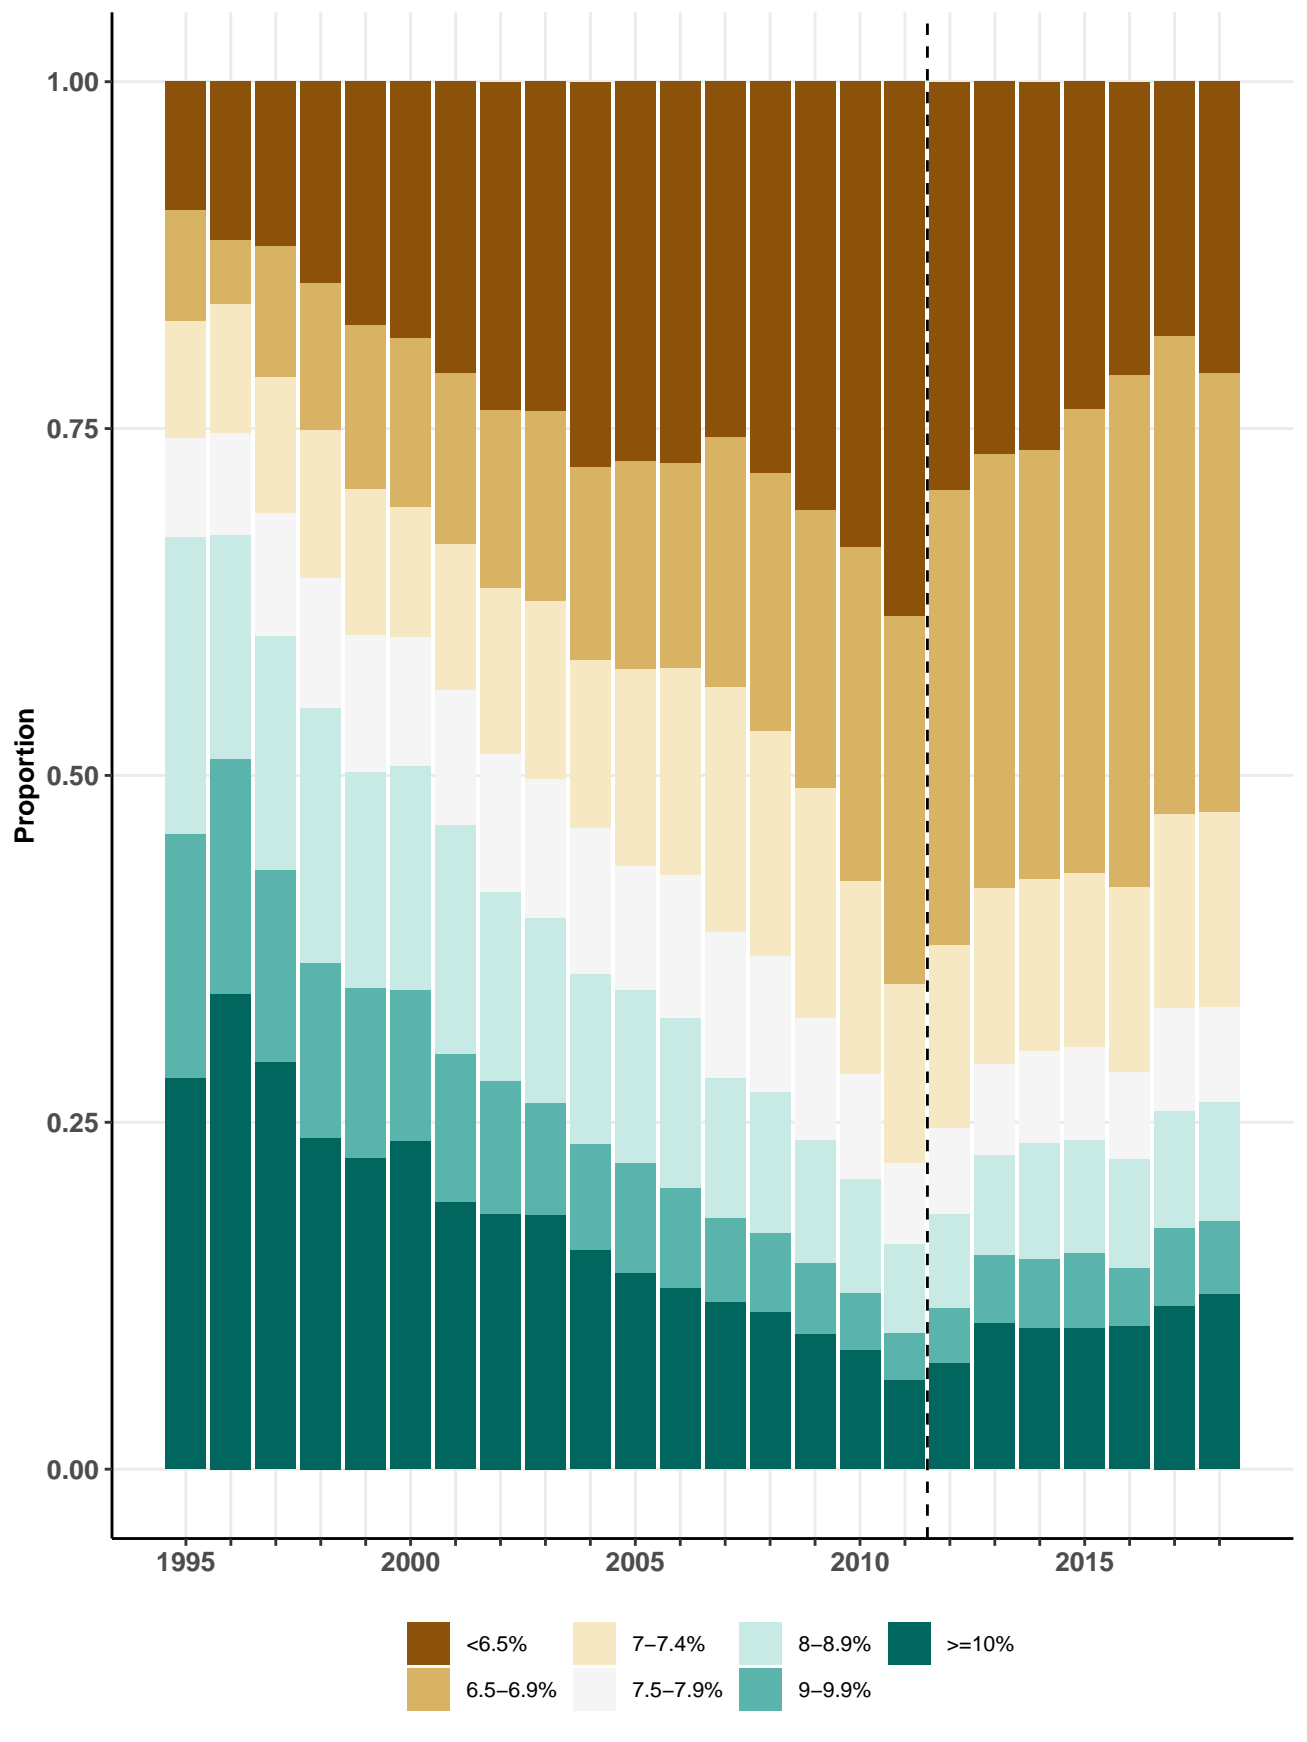

Supplement: mmc4.pdf [file mmc4.pdf]

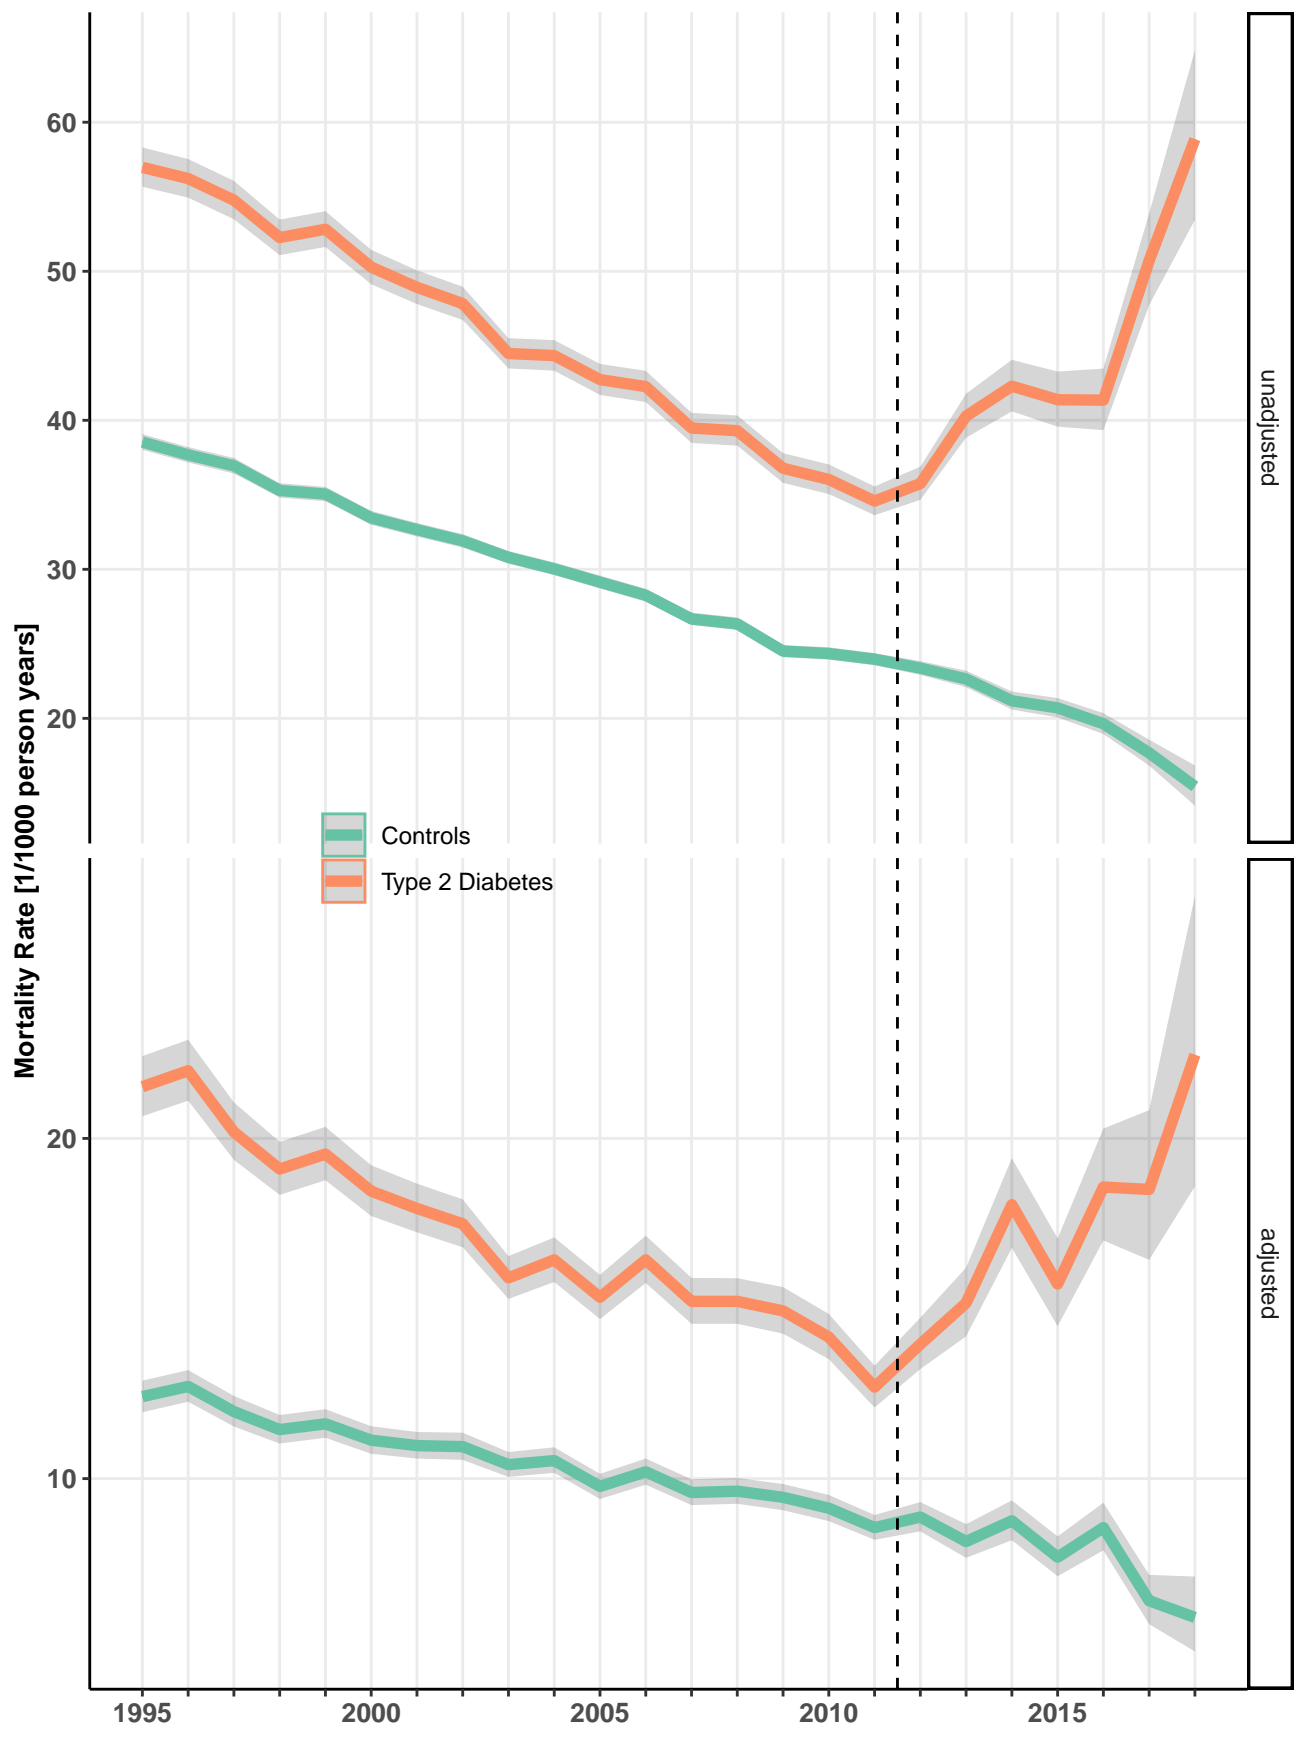

Supplement: mmc5.pdf [file mmc5.pdf]

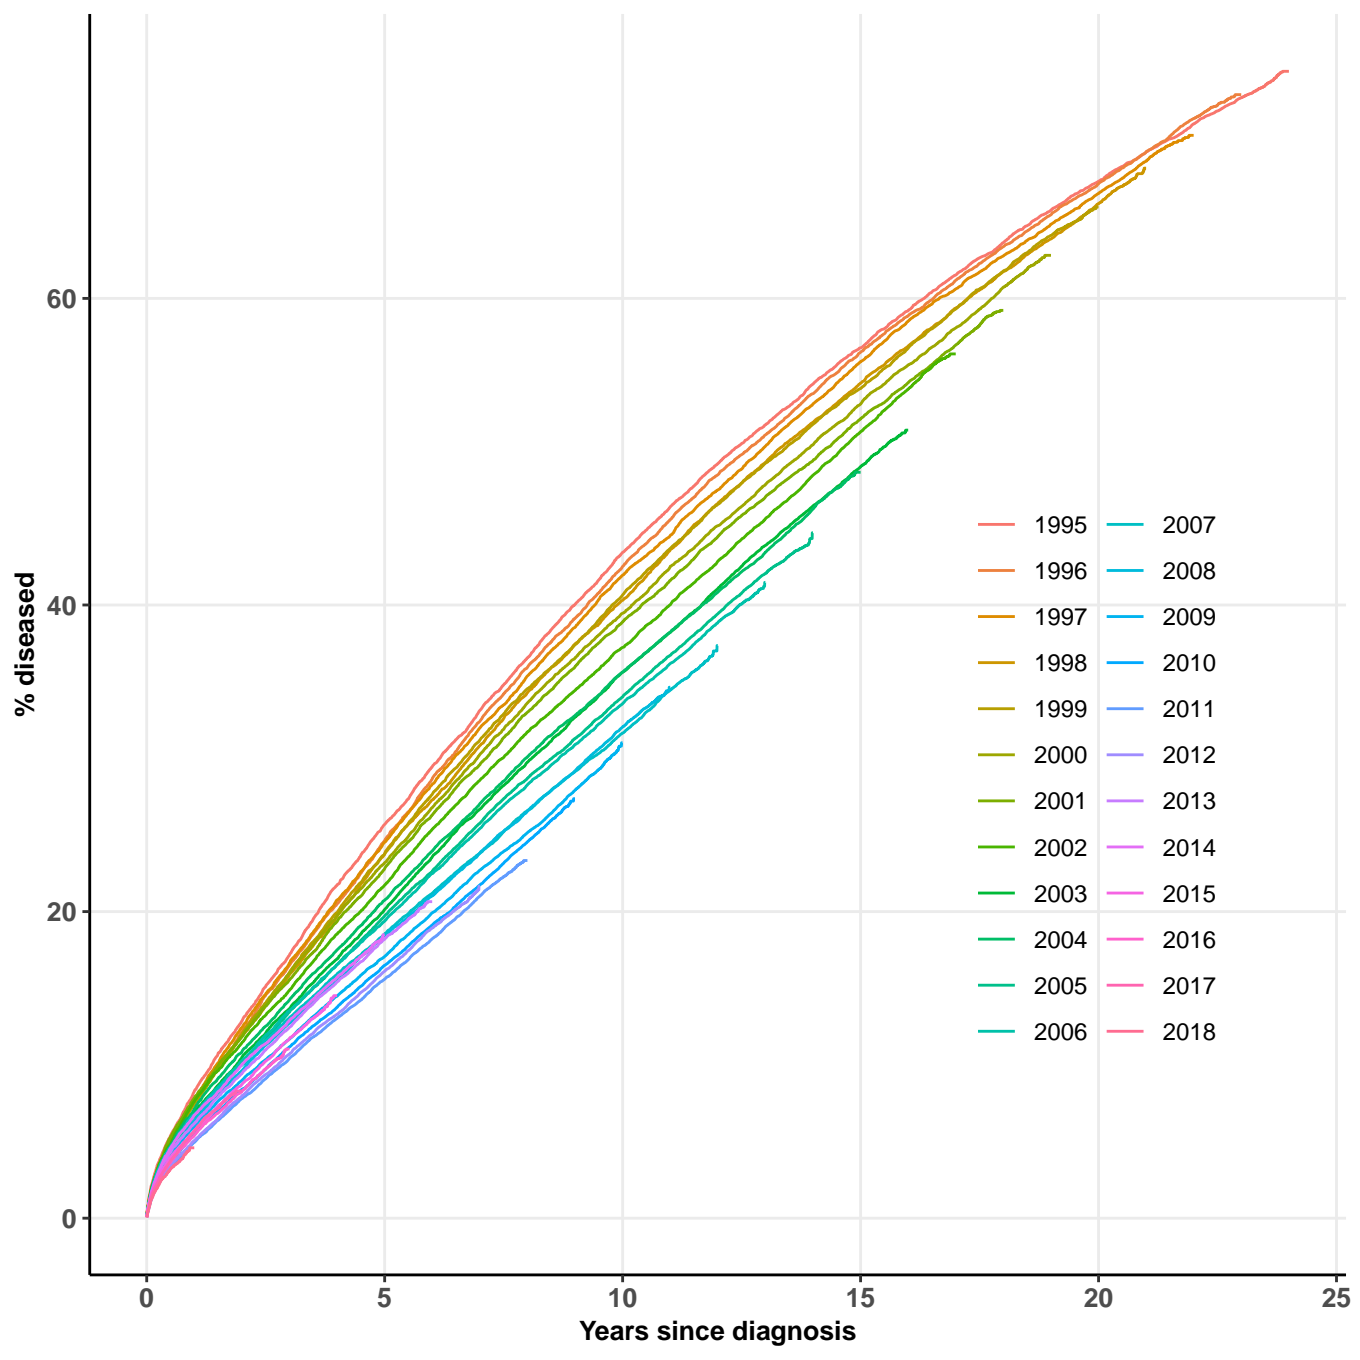

Supplement: mmc6.pdf [file mmc6.pdf]

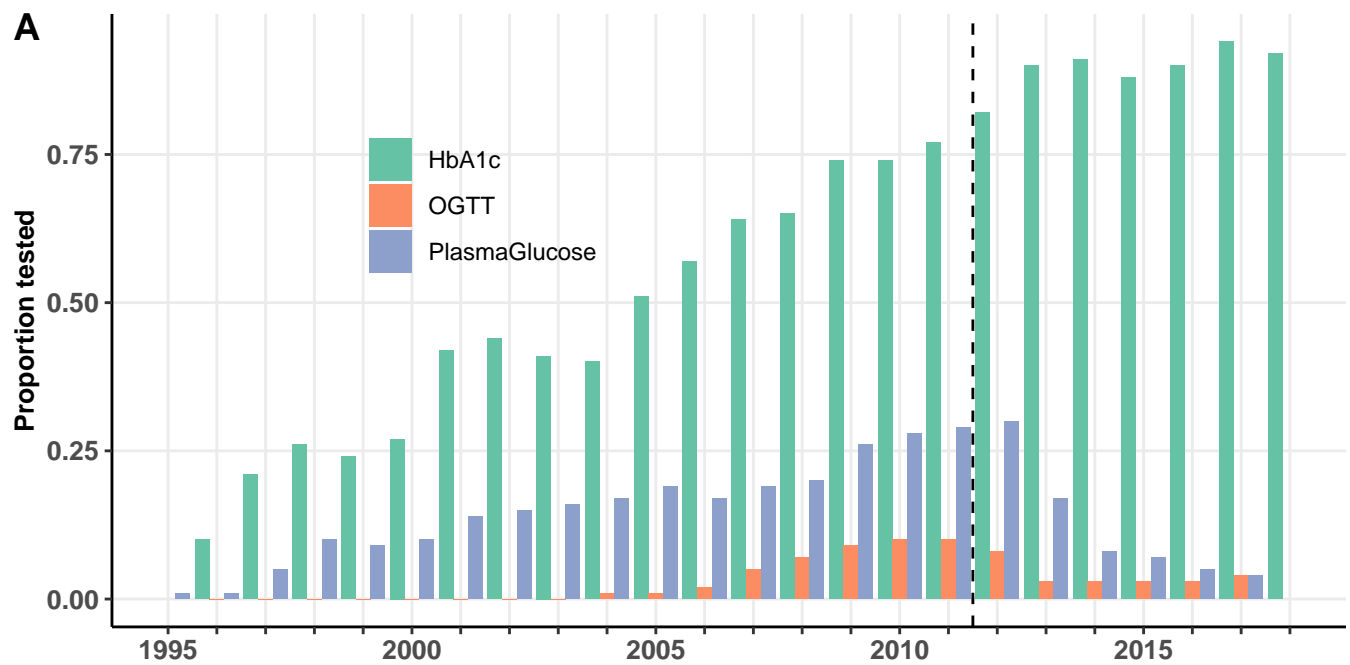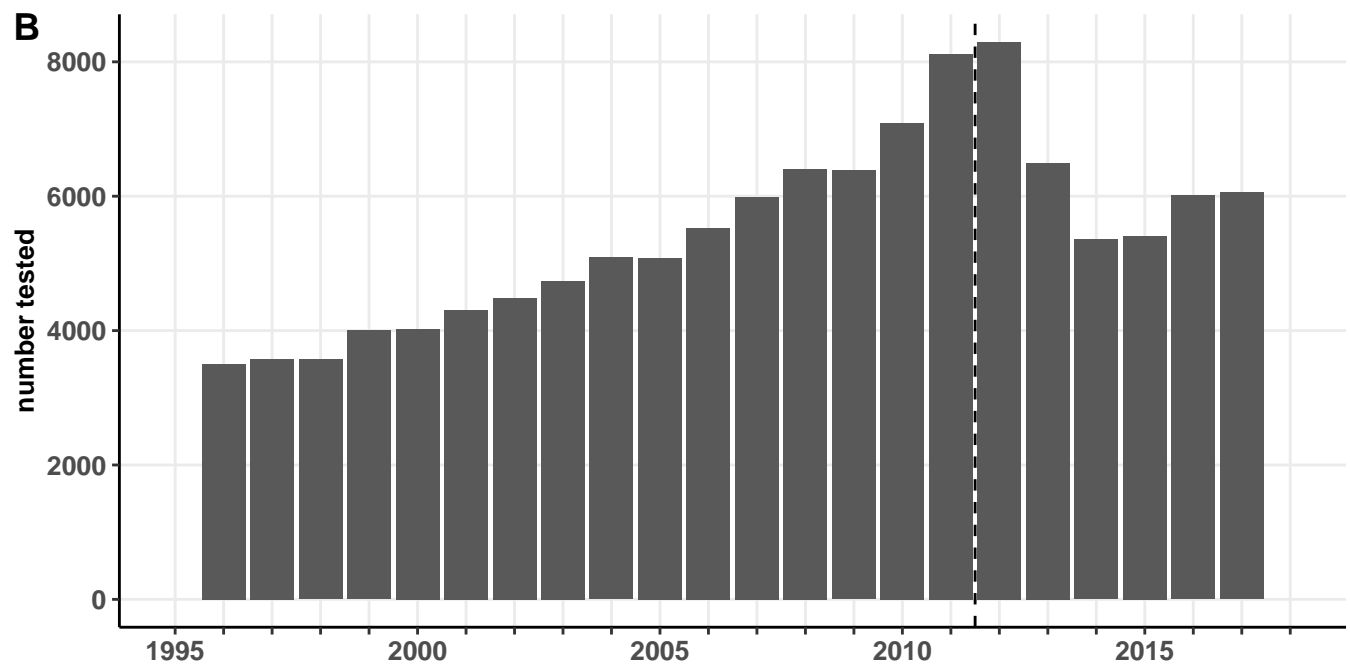

Supplement: mmc7.pdf [file mmc7.pdf]

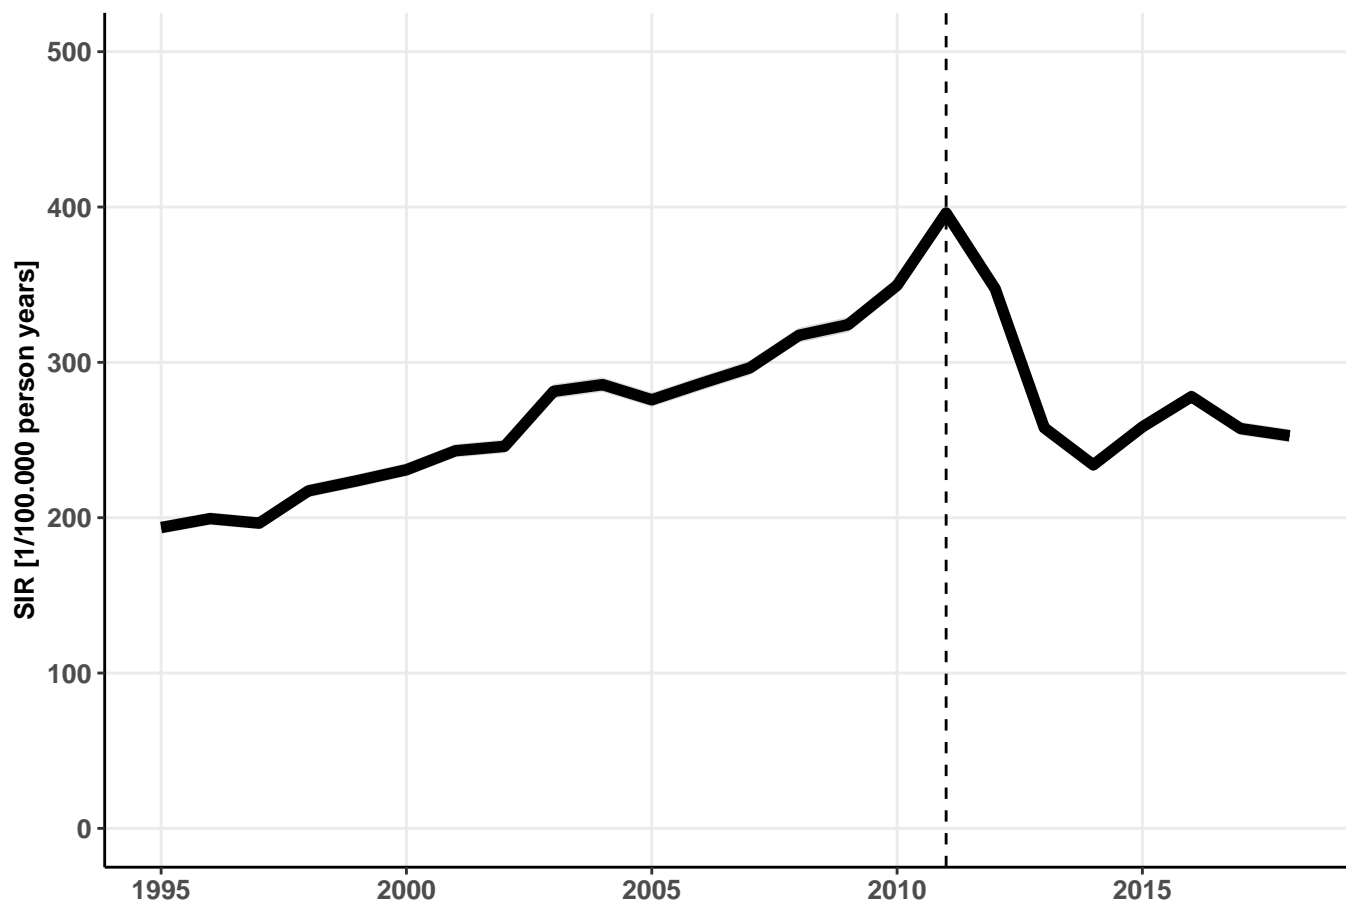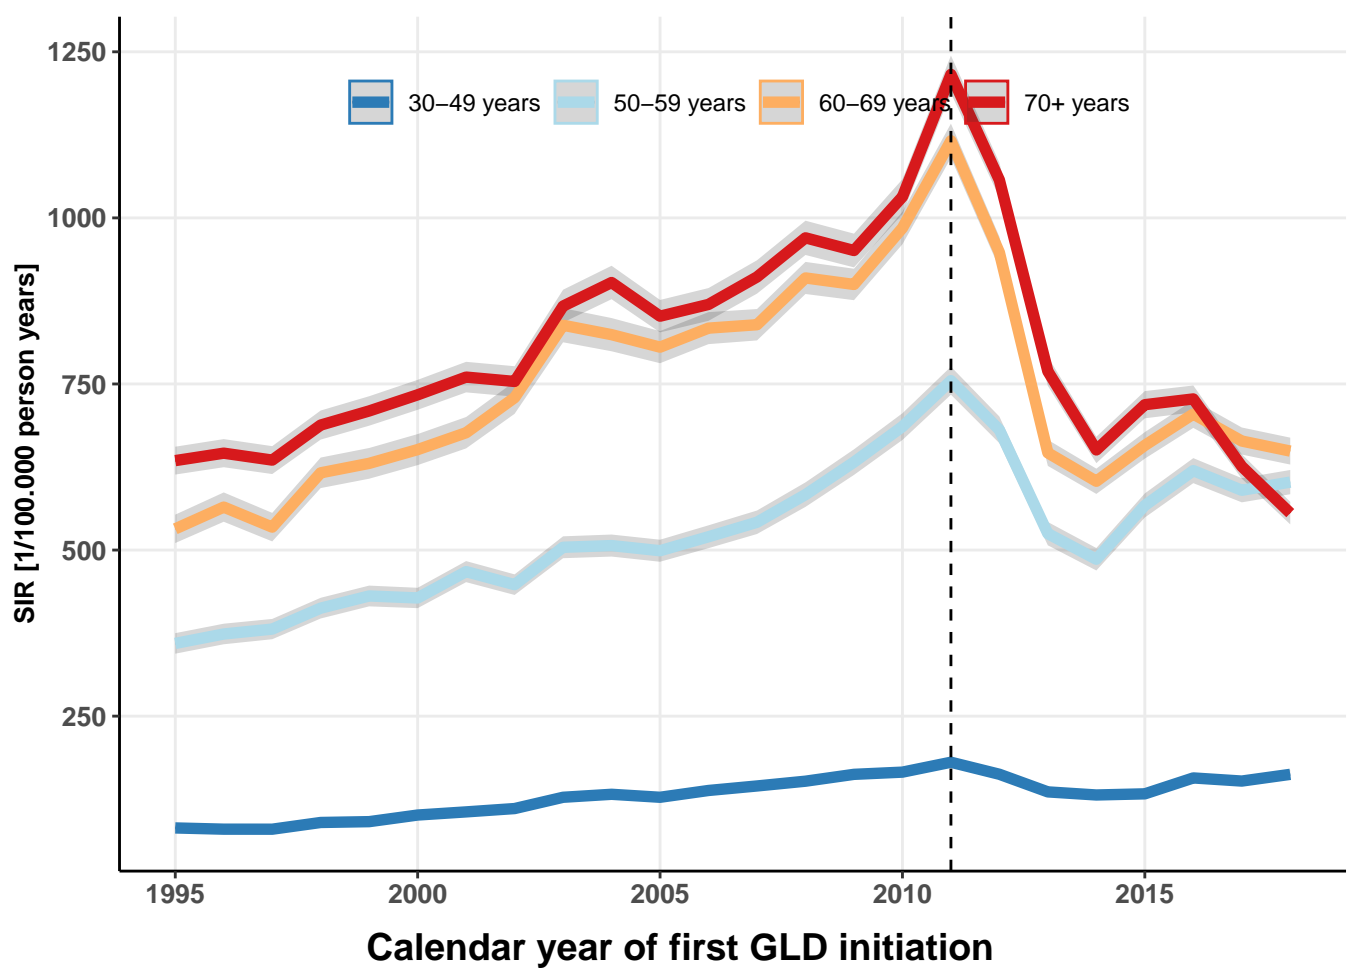

Supplement: mmc9.pdf [file mmc9.pdf]
